# Supplementary material
Source: PubMed Central journal article supplement (PMC8204534)
Supplement: NIHMS1644734-supplement-Fig_S1_PDF.pdf [file NIHMS1644734-supplement-Fig_S1_PDF.pdf]

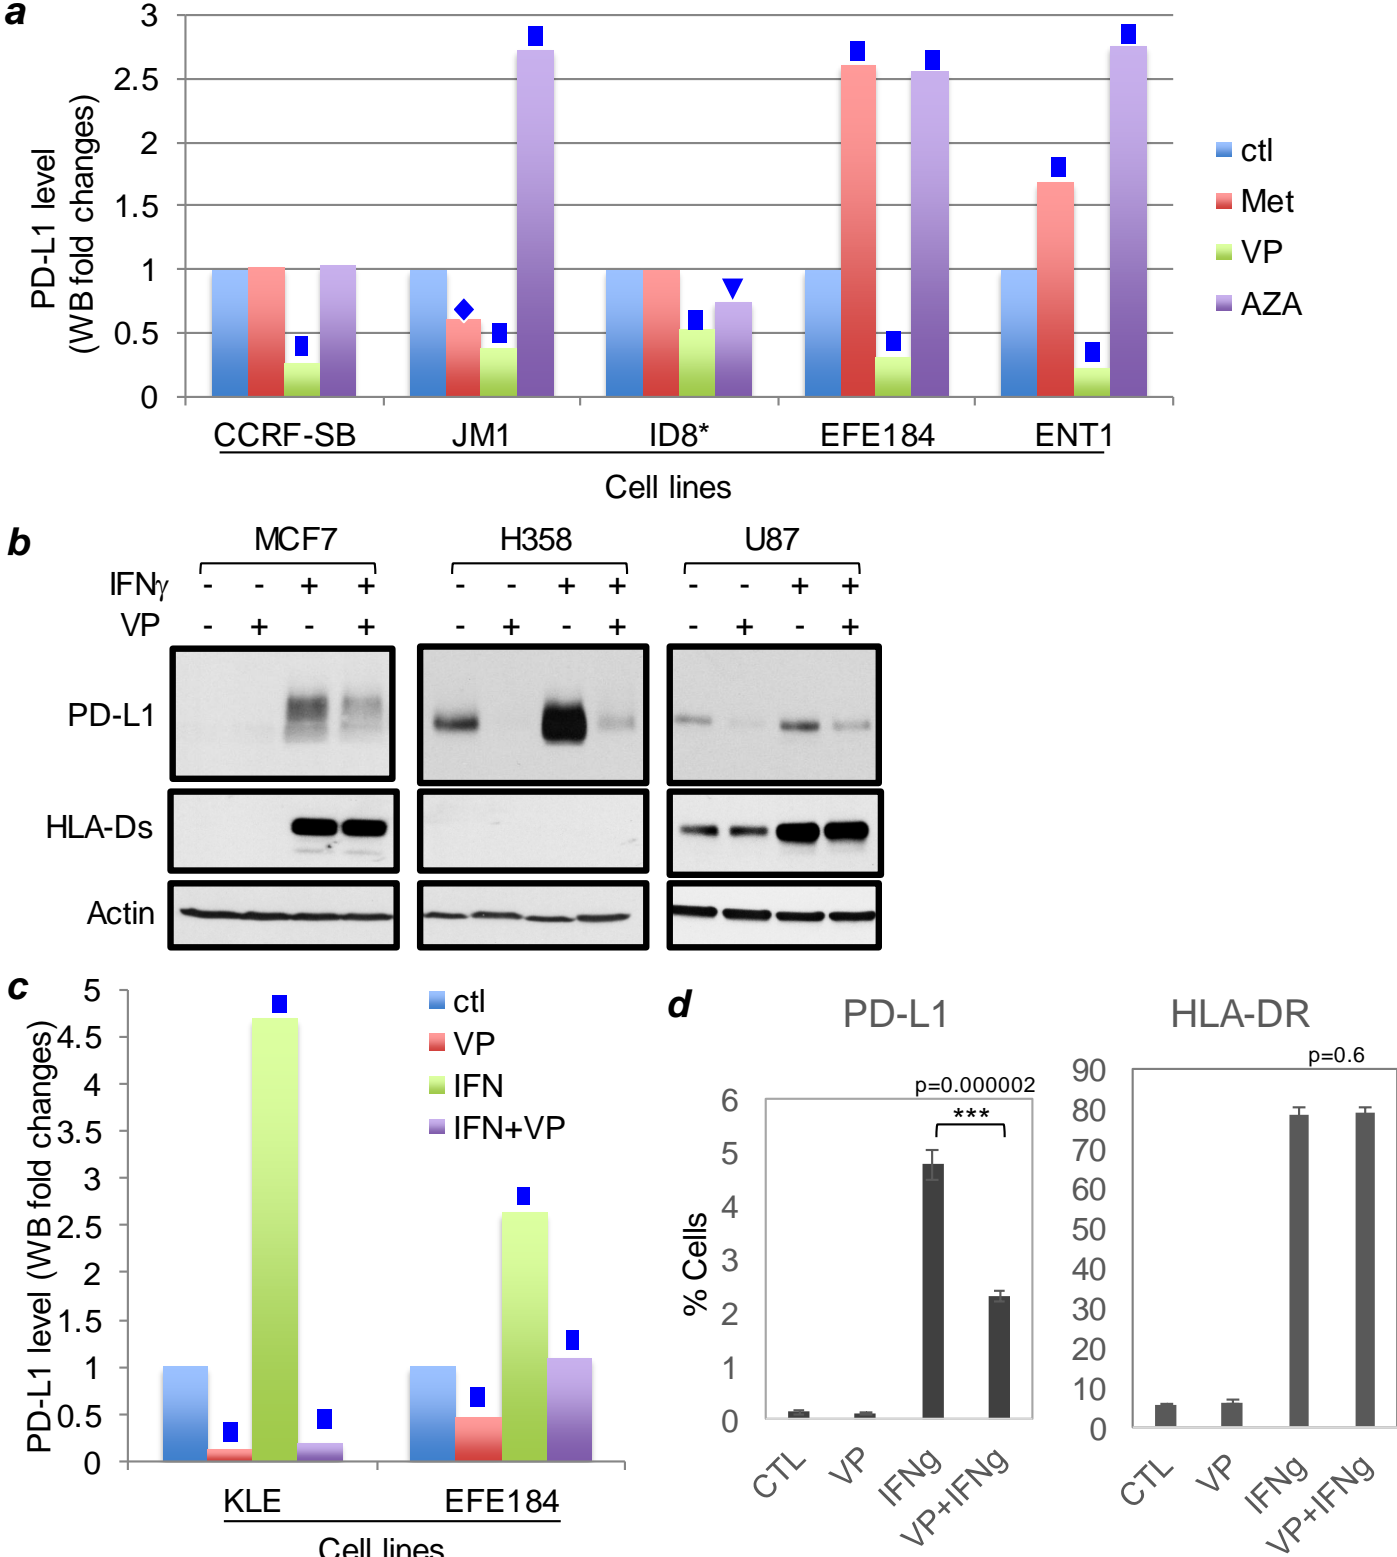

**Figure S1. Drug effects on PD-L1 protein levels: verteporfin inhibits basal and interferon-induced PD-L1 but not HLA-D expression**  
**a, b** and **c**, PD-L1 levels as determined by Western blotting (WB) and/or densitometry analysis from cell lines treated with respective drugs for 24-h. Blue triangles, diamonds, and squares denote weak ( $\leq 0.3$  folds), intermediate ( $> 0.3$  and  $< 0.5$  folds) and strong ( $\geq 0.5$  folds) drug effects respectively. Met, metformin (1mM); VP, verteporfin, (1 $\mu$ M); AZA, azacitidine (5nM); IFN, interferon  $\gamma$  (10ng/ml). **d**, flow cytometry analysis of PD-L1 and HLA-DR expression in THP-1 cells in the presence or absence of interferon  $\gamma$ .
