# Supplementary material
Source: PubMed Central journal article supplement (PMC8204534)
Supplement: NIHMS1644734-supplement-Fig_S2_PDF.pdf [file NIHMS1644734-supplement-Fig_S2_PDF.pdf]

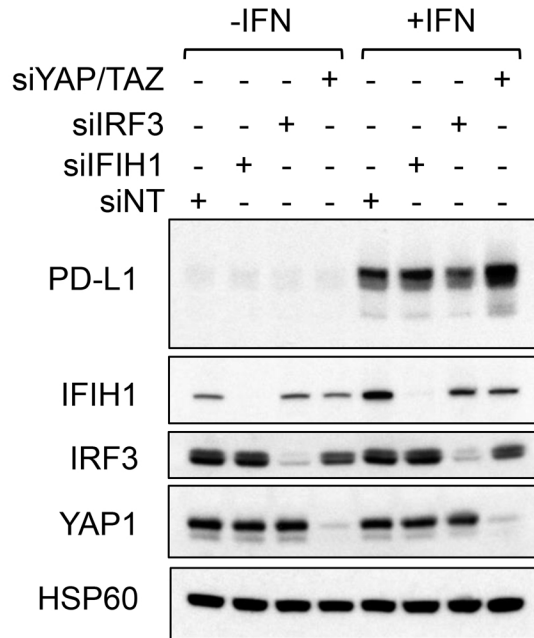

**Supplemental Figure S2. YAP1 and TAZ are not required for PD-L1 expression.**

Western blots of proteins from EFE184 cells after transfection with non-targeting (siNT), IFIH1 (siIFIH1), IRF3 (siIRF3), and YAP/TAZ (siYAP/TAZ) siRNA for 48 h and treated with or without interferon  $\gamma$  (5ng/ml) for 24 h.
