# Supplementary material
Source: PubMed Central journal article supplement (PMC8204534)
Supplement: NIHMS1644734-supplement-Fig_S3_PDF.pdf [file NIHMS1644734-supplement-Fig_S3_PDF.pdf]

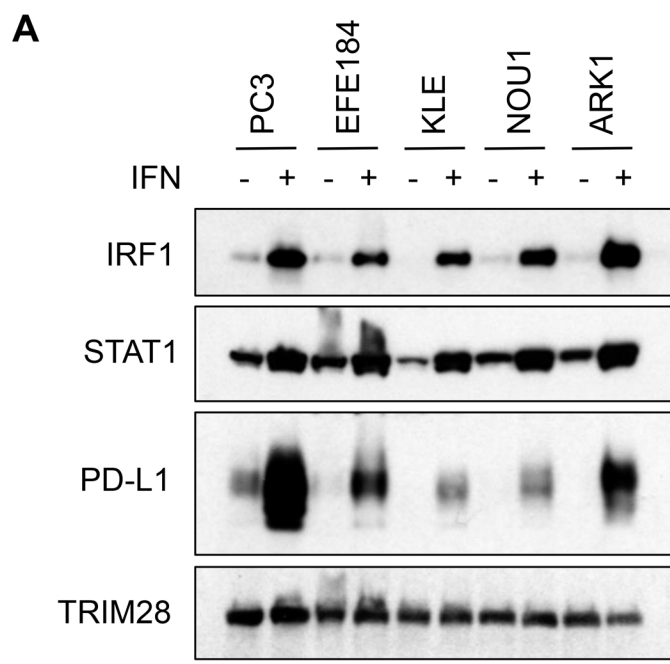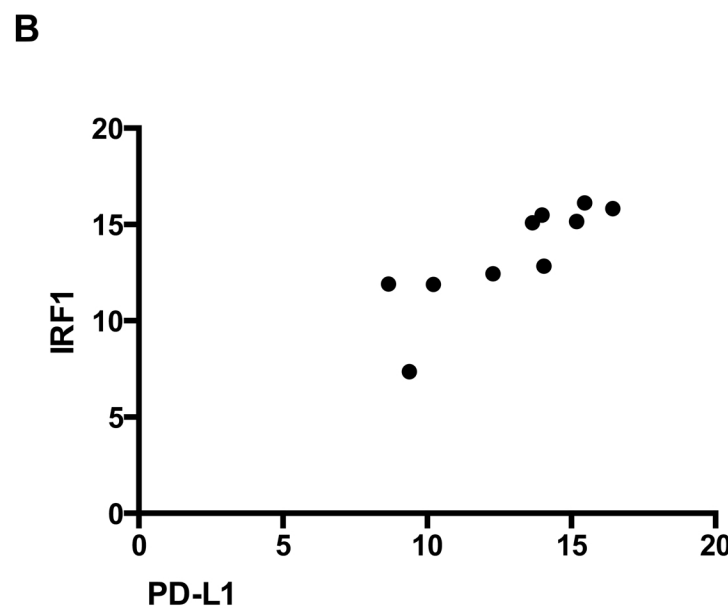

**Supplemental Fig S3. Interferon  $\gamma$  induces IRF1 and PD-L1 expression across multiple cell lineages**

**A**, Western blots of proteins in cancer cells treated with (+) or without (-) interferon  $\gamma$  (5ng/ml) for 24 h. **B**, Ozone correlations between IRF1 and PD-L1 levels (log).  $R=0.8337$  (Pearson,  $p=0.0027$ )
