# Supplementary material
Source: PubMed Central journal article supplement (PMC8204534)
Supplement: NIHMS1644734-supplement-Fig_S4_PDF.pdf [file NIHMS1644734-supplement-Fig_S4_PDF.pdf]

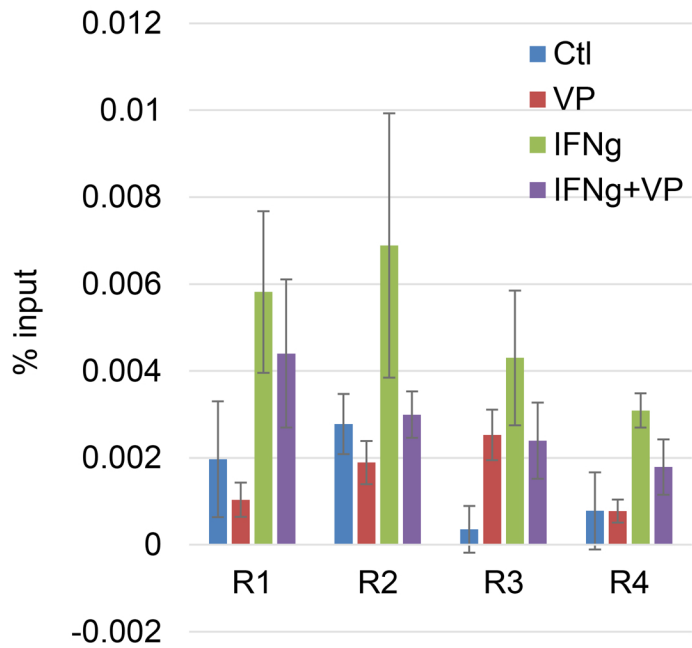

**Supplemental Figure S4. Effects of verteporfin and/or interferon on STAT1 recruitment onto the PD-L1 promoter**

CHIP assays for STAT1 on PD-L1 gene promoter regions (R1~4; see **Figure 3g**) in EFE184 cells treated with or without interferon and verteporfin for 24 h. Data represent the mean of 3 independent repeats. Error bars, standard deviations.
